# Supplementary material for: Sex-associated differences in mitochondrial function in human peripheral blood mononuclear cells (PBMCs) and brain
Source: PubMed Central journal article supplement (PMC6060503; doi:10.1186/s13293-018-0193-7), 2018-07-25
Supplement: 13293_2018_193_MOESM1_ESM.pdf [file 13293_2018_193_MOESM1_ESM.pdf]

## Calculation of B1 and Coil-Receive-Profile corrected metabolite concentrations normalized to tissue water.

Metabolite signal intensities were corrected for T1 and T2 relaxation assuming previously published relaxation times at 3 T [44]. Further, B1 inhomogeneity were taken into account by division with  $\sin^5(\alpha)$ , where  $\alpha$ , the real flip angle at the position of the voxel [45], was calculated from the B1 maps. A receive profile of the coil  $RP_{coil}$  (including other constants related to signal amplification and postprocessing) can be determined by

$$RP_{Coil} = \frac{S}{C \cdot V_{mrsi}} \quad (1)$$

where  $S$  represents the measured signal of a substance at concentration  $C$  following a  $90^\circ$  pulse and  $V_{mrsi}$  the MRSI voxel size.  $RP_{coil}$  can be represented by a matrix with the dimension of the spectroscopic image. The metabolite concentration  $C_{met}$  can be calculated by

$$C_{met} = \frac{S_{met}}{\sin^5 \alpha \cdot RP_{coil} \cdot V_{mrsi}} \quad (2)$$

with  $S_{met}$  representing the relaxation corrected metabolite signals.

$RP_{coil}$  at the slice of the  $^1H$  MRSI data can be obtained from the FID MRSI data of water with

$$RP_{Coil} = \frac{S_{wat}}{\sin(0.22 \alpha) \cdot C_{wat} \cdot V_{mrsi}} \quad (3)$$

$S_{wat}$  represents the relaxation corrected water intensity while the term  $\sin(0.22\alpha)$  takes into account the effect of B1 inhomogeneity and the  $2^\circ$  flip angle. Due to the small flip angle and the short delay between excitation and acquisition, no relaxation corrections are required for water. The concentration  $C_{wat}$  in the voxel can be estimated with:

$$C_{wat} = (0.73 GM_{fraction} + 0.64 WM_{fraction} + CSF_{fraction}) \cdot 55 \text{ mol/l} \quad (4)$$

assuming 73% water in the GM fraction ( $GM_{fraction}$ ), 64% water in the WM fraction ( $WM_{fraction}$ ) and 100 % water in the CSF fraction ( $CSF_{fraction}$ ). The  $RP_{coil}$  matrix obtained for water was adjusted to to the matrix for PRESS CSI by interpolation and then used in equation (2) to calculate  $C_{met}$ . Finally, the absolute concentrations referred to tissue water ( $C_{metwat}$ ) were calculated by

$$C_{metwat} = \frac{C_{met}}{GM_{fraction} + WM_{fraction}} \quad (5)$$
